# Supplementary material
Source: MDPI journal article supplement (https://www.mdpi.com/2075-4701/14/1/104)
Supplement: s1 [file s1]

Supplementary materials for:

# Effect of Cold Rolling on Microstructure and Mechanical Properties of a Cast TiNbZr-based Composite Reinforced with Borides

Maxim Ozerov <sup>1,\*</sup>, Vitaly Sokolovsky <sup>1</sup>, Nikita Yurchenko <sup>1</sup>, Ilya Astakhov <sup>1</sup>, Elizaveta Povolyaeva <sup>1</sup>, Oleg Plekhov <sup>2</sup>, Damir Tagirov <sup>1</sup>, Nikita Stepanov <sup>1</sup> and Sergey Zherebtsov <sup>1</sup>

<sup>1</sup> Laboratory of Bulk Nanostructured Materials, Belgorod State University, 308015 Belgorod, Russia

<sup>2</sup> Institute of Continuous Media Mechanics, Ural Branch of Russian Academy of Science, 614013 Perm, Russia

\* Correspondence: ozerov@bsu.edu.ru; Tel.: +7-4722-58-54-16

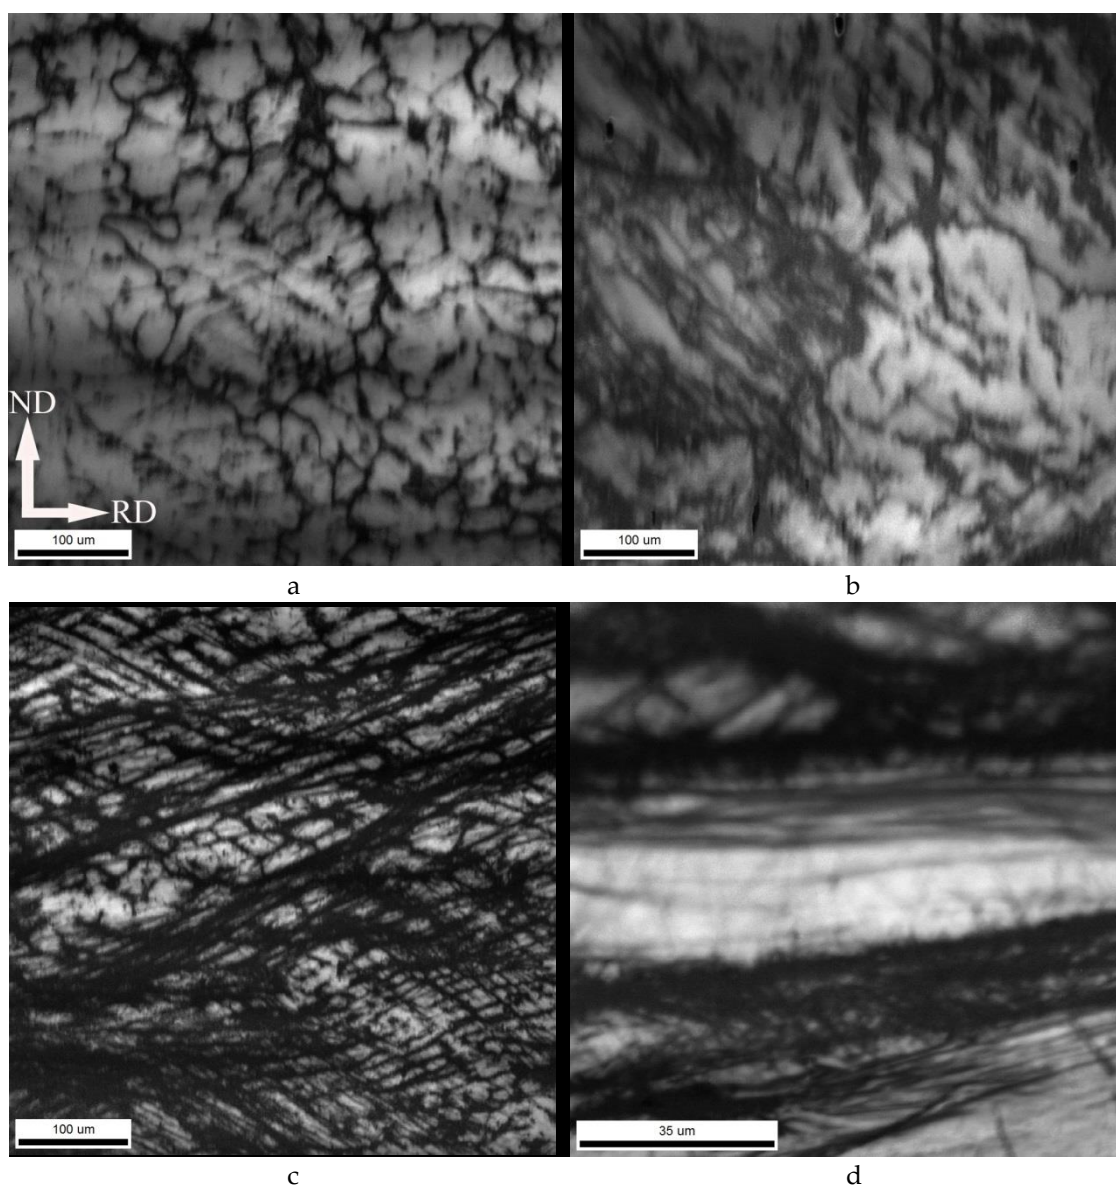

**Figure S1.** Image quality maps taken from the TD plane of the TiNbZr/(Ti, Nb)B composite cold rolled to a thickness strain of 10 % (a), 20 % (b), 50 % (c) and 80 % (d).

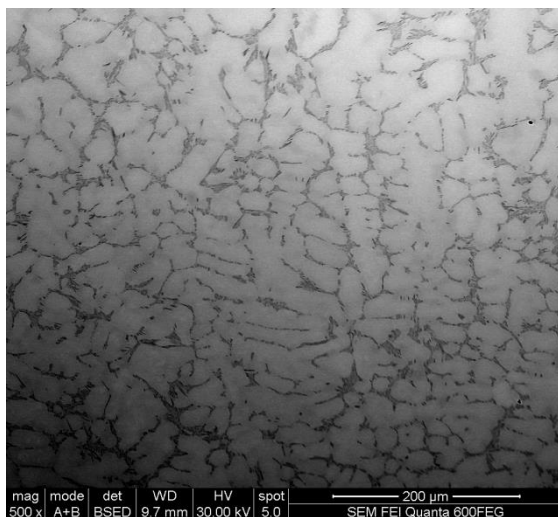

a

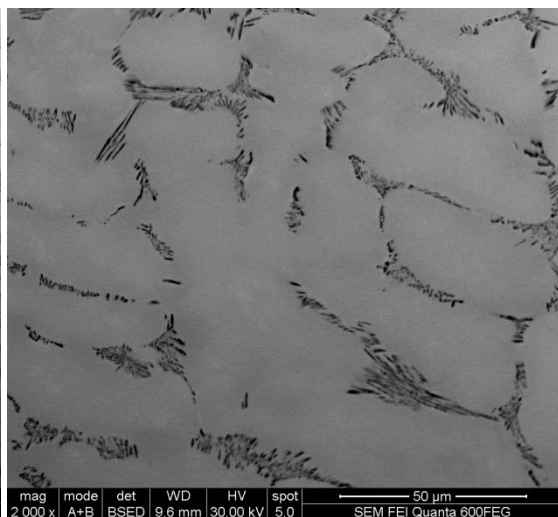

b

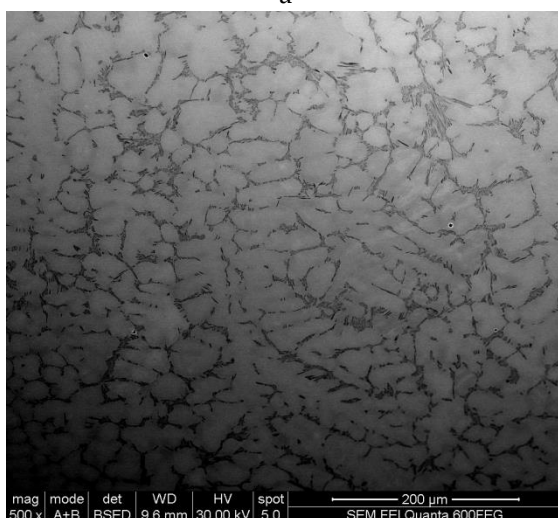

c

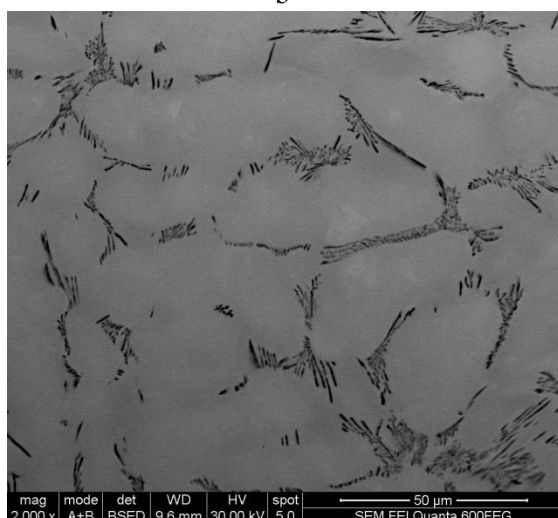

d

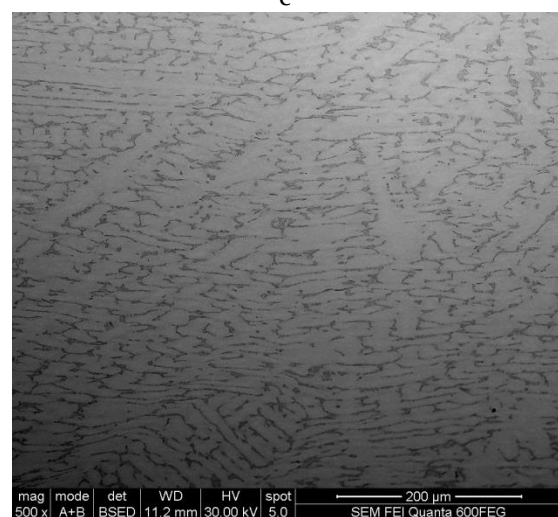

e

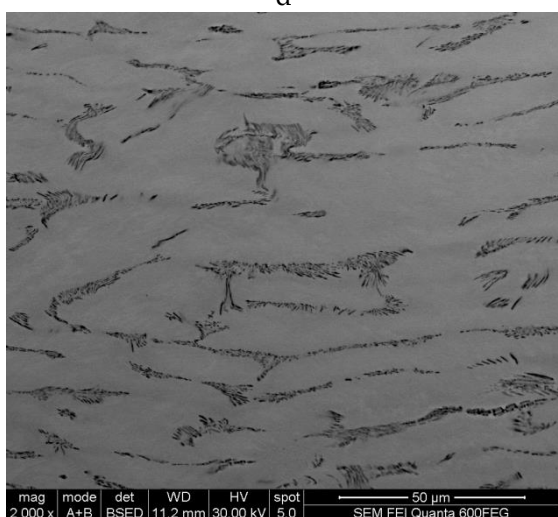

f

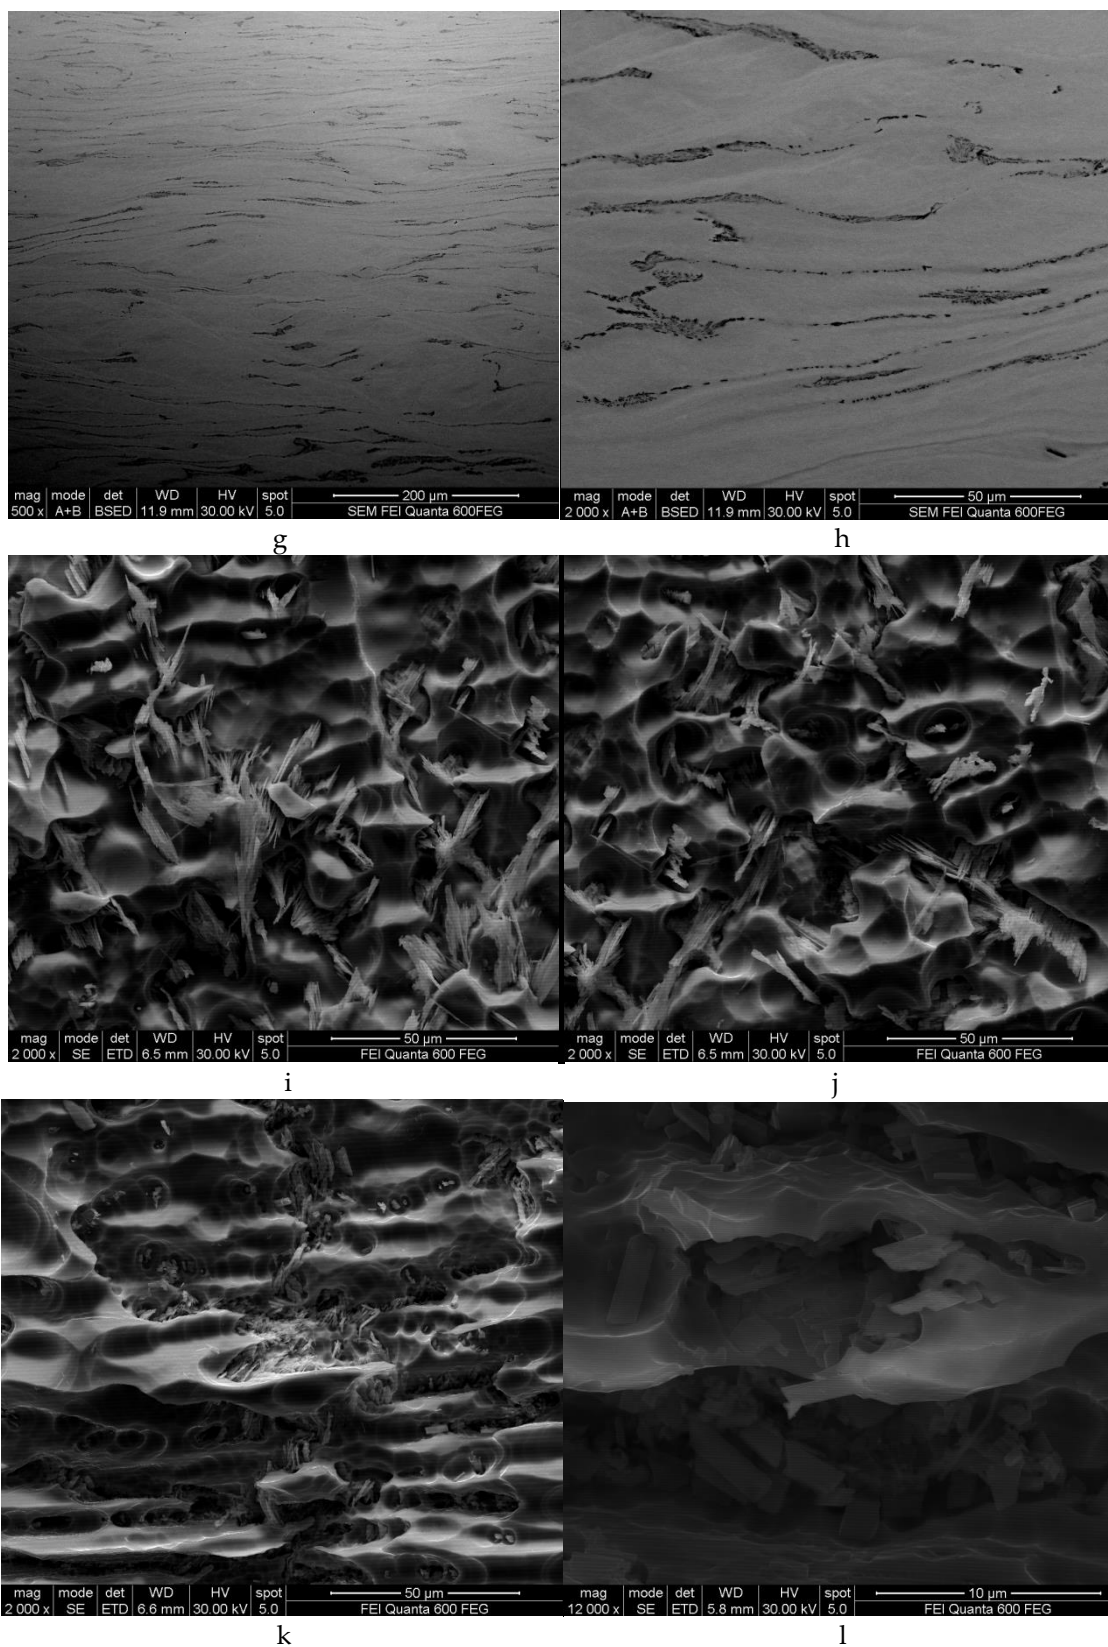

**Figure S2.** SEM images of polished (a–h) or etched surfaces (i–l) of the composite taken after rolling to thickness strains 10% (a, b, i), 20 % (c, d, j), 50 % (e, f, k) and 80 (g, h, l).
